# Supplementary material
Source: PubMed Central journal article supplement (PMC5118931)
Supplement: AEM.02495-16_aem02495-16_Supp_1_seq2.pdf [file AEM.02495-16_aem02495-16_Supp_1_seq2.pdf]

## Supplementary Material

**Figure S1.** Organization of GTA structural genes in *Citromicrobium* genomes. A, GTA in strains JL31, JL354, JL477, JL1351, JL2201, RCC1878, RCC1885 and RCC1897; B, GTA in strain WPS32. Yellow, conserved upstream and downstream genes (from 1 to 7) of the GTA structural gene cluster in *Citromicrobium* genomes; red, a putative transposase; pink, functions known in GTA genes; white, hypothetical genes; gray, conserved hypothetical genes belonging to GTA.

**Figure S2.** Structure and organization of prophage in *Citromicrobium*. Pink, early expression genes; orange, heads; yellow, tails; red, transposase; green, lysozyme genes; light gray, putative proteins.

**Table S2.** Average Nucleotide Identity by pairwise genome comparison

Figure S1

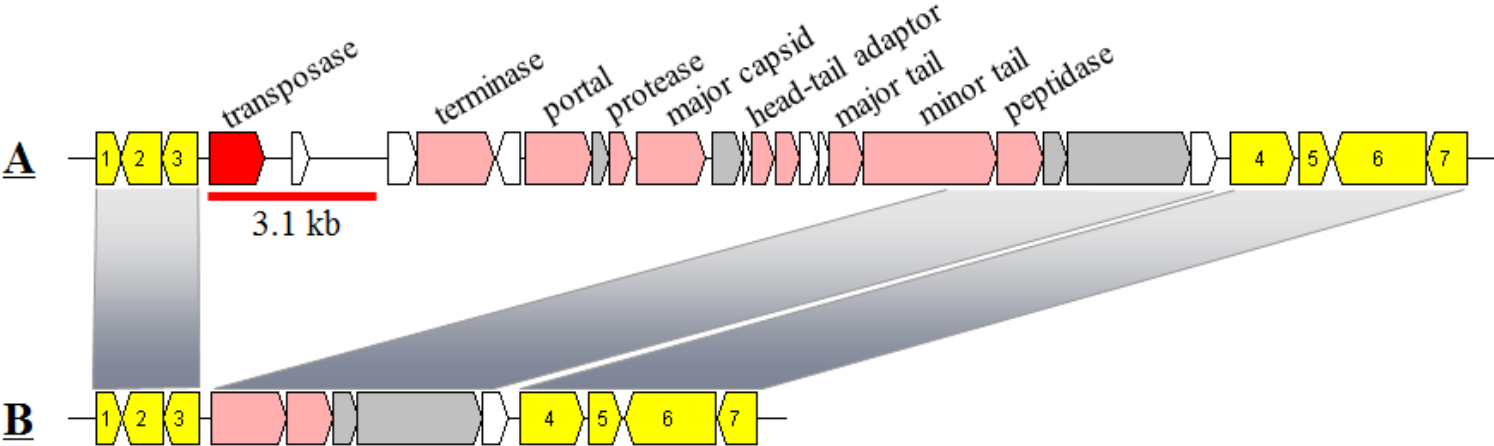

Figure S2

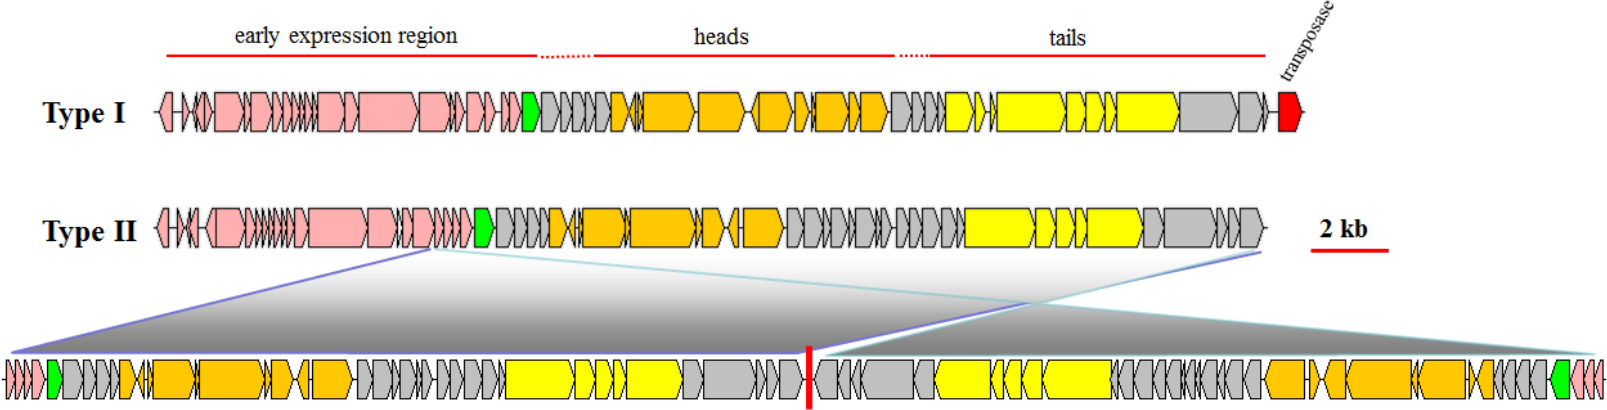

**Table S2.** Average Nucleotide Identity by pairwise genome comparison

|         | <b>JL31</b>             | <b>JL354</b>            | <b>JL477</b>            | <b>JL1351</b>           | <b>JL2201</b>           | <b>RCC1878</b>          | <b>RCC1885</b>          | <b>RCC1897</b>          | <b>WPS32</b>            |
|---------|-------------------------|-------------------------|-------------------------|-------------------------|-------------------------|-------------------------|-------------------------|-------------------------|-------------------------|
| JL31    | *                       | <b>99.86</b><br>[96.54] | <b>99.88</b><br>[96.55] | <b>100</b><br>[99.63]   | <b>100</b><br>[99.67]   | <b>96.32</b><br>[91.00] | <b>96.32</b><br>[90.99] | <b>96.32</b><br>[90.99] | <b>96.29</b><br>[90.41] |
| JL354   | <b>99.71</b><br>[93.86] | *                       | <b>100</b><br>[98.73]   | <b>99.71</b><br>[93.88] | <b>99.63</b><br>[94.85] | <b>96.04</b><br>[88.79] | <b>96.04</b><br>[88.78] | <b>96.04</b><br>[88.78] | <b>96.19</b><br>[87.26] |
| JL477   | <b>99.72</b><br>[93.70] | <b>99.98</b><br>[98.69] | *                       | <b>99.73</b><br>[93.75] | <b>99.64</b><br>[94.87] | <b>95.96</b><br>[88.84] | <b>95.96</b><br>[88.84] | <b>95.96</b><br>[88.84] | <b>96.15</b><br>[87.09] |
| JL1351  | <b>100</b><br>[99.59]   | <b>99.83</b><br>[96.58] | <b>99.84</b><br>[96.63] | *                       | <b>100</b><br>[99.66]   | <b>96.34</b><br>[91.01] | <b>96.34</b><br>[91.00] | <b>96.34</b><br>[91.03] | <b>96.31</b><br>[90.60] |
| JL2201  | <b>100</b><br>[96.25]   | <b>99.57</b><br>[94.63] | <b>99.57</b><br>[94.83] | <b>100</b><br>[96.28]   | *                       | <b>96.17</b><br>[90.06] | <b>96.17</b><br>[90.06] | <b>96.17</b><br>[90.06] | <b>96.34</b><br>[87.43] |
| RCC1878 | <b>96.47</b><br>[87.37] | <b>96.26</b><br>[87.53] | <b>96.22</b><br>[87.49] | <b>96.47</b><br>[87.43] | <b>96.46</b><br>[88.33] | *                       | <b>100</b><br>[99.62]   | <b>100</b><br>[99.62]   | <b>96.45</b><br>[87.04] |
| RCC1885 | <b>96.47</b><br>[87.40] | <b>96.27</b><br>[87.47] | <b>96.24</b><br>[87.42] | <b>96.47</b><br>[87.44] | <b>96.45</b><br>[88.32] | <b>100</b><br>[99.65]   | *                       | <b>100</b><br>[99.65]   | <b>96.47</b><br>[86.97] |
| RCC1897 | <b>96.40</b><br>[87.35] | <b>96.22</b><br>[87.31] | <b>96.16</b><br>[87.42] | <b>96.40</b><br>[87.37] | <b>96.39</b><br>[88.21] | <b>99.98</b><br>[99.64] | <b>99.98</b><br>[99.64] | *                       | <b>96.48</b><br>[86.65] |
| WPS32   | <b>96.39</b><br>[89.91] | <b>96.44</b><br>[89.07] | <b>96.41</b><br>[88.84] | <b>96.39</b><br>[89.95] | <b>96.39</b><br>[89.90] | <b>96.51</b><br>[89.98] | <b>96.51</b><br>[89.98] | <b>96.51</b><br>[89.98] | *                       |
